# Supplementary material for: A 1,8-naphthalimide-based fluorescent probe for selective and sensitive detection of peroxynitrite and its applications in living cell imaging
Source: Royal Society of Chemistry journal article supplement (doi:10.1039/c7ra04317a), 2017-01-01
Supplement: c7ra04317a1.pdf [file c7ra04317a1.pdf]

## Supplementary material

### **A 1,8-naphthalimide-based fluorescent probe for selective and sensitive detection of peroxynitrite and its applications in living cell imaging**

XiulanLi,<sup>‡a</sup>JingliHou,<sup>‡a</sup>ChaoPeng,<sup>a</sup> Li Chen,<sup>a</sup>WenboLiu<sup>a</sup>and Yangping Liu<sup>\*a</sup>

*<sup>a</sup>Tianjin Key Laboratory on Technologies Enabling Development of Clinical Therapeutics and Diagnostics, School of Pharmacy, Tianjin Medical University, Tianjin 300070, P. R. China. E-mail: liuyangping@tmu.edu.cn*

<sup>#</sup>These authors contribute equally to this work.

## 1. General methods

All reagents and solvents were purchased from commercial sources and were of the analytic grade. All reactions were performed in oven-dried apparatus under argon atmosphere.

Ultraviolet absorption spectra were taken on Hitachi U-3900 spectrophotometer. Fluorescence spectra were taken on Hitachi F-4600 fluorescence spectrometer. The  $^1\text{H}$  NMR and  $^{13}\text{C}$  NMR spectra were recorded on a Bruker Avance-400 FT nuclear magnetic resonance spectrometer. The following abbreviations were used to explain the multiplicities: s = singlet; d = doublet; t = triplet; q = quartet; m = multiplet; br = broad. HPLC and LC-MS analysis was performed with an Agilent 1260 HPLC system and an Agilent 1200-Bruker HCT LC-MS system, respectively. High resolution mass spectra were obtained on a Varian QFT-ESI mass spectrometer. Confocal images were scanned by Laser Confocal Scanning Biological Microscope OlympusFV1200.

## 2. Synthesis of Probes

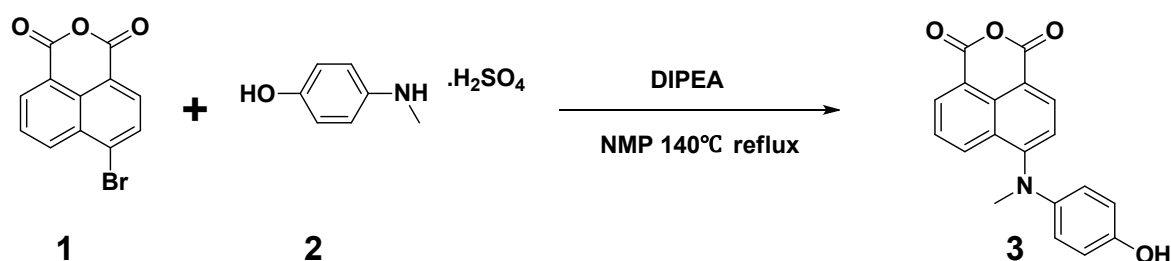

The mixture of 4-Bromo-1,8-naphthalimide (0.1 g, 1 mmol, 1.0 eq.) and 4-methylaminophenol sulfate (1.244 g, 5 mmol, 5.0 eq.) in NMP (5 mL) was stirred for 10min at room temperature, then DIPEA (0.6 mL) was added. The resulting solution was stirred and refluxed under argon for 5h at 140 °C. After the reaction was completed, the solvent was removed under vacuum. The crude product was dissolved in acetone, filtered insoluble residues and the filtrate was concentrated in vacuum <sup>1</sup>. The concentrated solution was crystallized in a low temperature and furnished the desired product as reddish brown powder. Yield: 0.121 g, 52%.

$^1\text{H}$ -NMR (400 MHz, DMSO)  $\delta$  9.44 (s, 1H), 8.46 (dd,  $J$  = 8.3, 1.6 Hz, 1H), 8.36 (d,  $J$

= 7.3 Hz, 1H), 8.03 (d,  $J$  = 1.7 Hz, 1H), 7.56 – 7.50 (m, 1H), 7.46 (dd,  $J$  = 8.4, 1.3 Hz, 1H), 6.94 – 6.87 (m, 1H), 6.73 – 6.69 (m, 1H), 3.47 (s, 1H).  $^{13}\text{C}$ -NMR (100 MHz, DMSO)  $\delta$  161.2, 160.2, 154.4, 153.5, 142.6, 134.5, 132.8, 132.2, 132.0, 125.1, 124.7, 124.5, 119.1, 116.4, 116.1, 110.0, 43.9

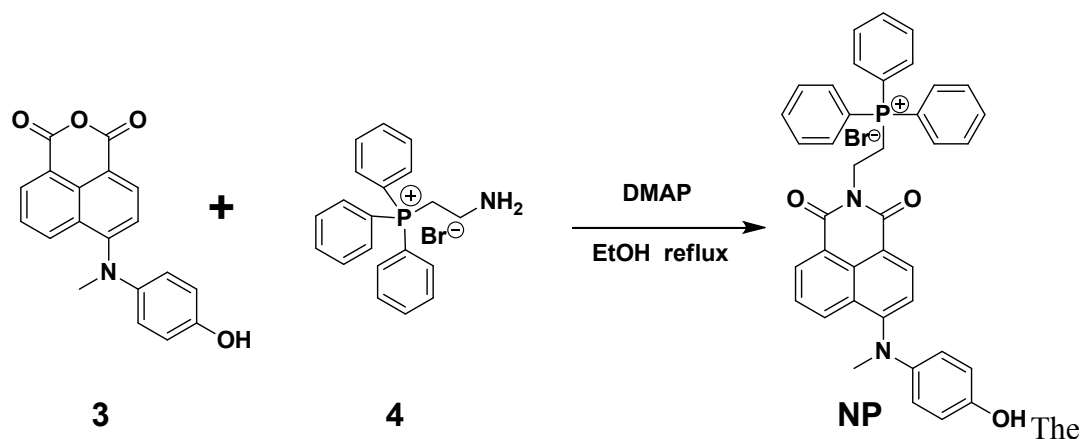

obtained compound 3 (0.103 g, 1 mmol, 1.0 eq.) and DMPA (0.042 g, 1.10 mmol, 1.1 eq.) were added to stirred solution of compound 4 (0.133 g, 1.10 mmol, 1.1 eq.) in ethanol. The mixture was then heated at reflux for 7 h under argon atmosphere, and monitored by TLC. After the reaction was completed, the solvent was evaporated.<sup>2,3</sup> The crude product was then purified by column chromatography with  $\text{CH}_2\text{Cl}_2/\text{MeOH}$  (20:1, v/v), to give NP as a brown solid, Yield: 0.101 g, 47%.

$^1\text{H}$ -NMR (400 MHz,  $\text{CDCl}_3$ )  $\delta$  9.52 (s, 1H), 8.30 (d,  $J$  = 8.3 Hz, 1H), 8.14 (d,  $J$  = 7.0 Hz, 1H), 7.97 (d,  $J$  = 8.4 Hz, 1H), 7.86 – 7.58 (m, 5H), 7.14 (dd,  $J$  = 15.6, 7.8 Hz, 1H), 7.02 (d,  $J$  = 8.7 Hz, 1H), 6.76 (d,  $J$  = 8.7 Hz, 1H), 4.68 – 4.49 (m, 1H), 3.93 (s, br, 1H), 3.43 (s, 1H).  $^{13}\text{C}$ -NMR (100 MHz,  $\text{CDCl}_3$ )  $\delta$  170.8, 164.3, 163.5, 155.6, 154.2, 142.6, 135.4, 133.6, 133.5, 130.7, 130.6, 124.7, 124.6, 124.5, 121.4, 118.1, 117.5, 117.2, 114.6, 113.0, 44.3, 34.1, 21.7. HRMS (ESI) calcd for  $\text{C}_{39}\text{H}_{32}\text{N}_2\text{O}_3\text{P}$   $[\text{M}-\text{Br}]^+$ : 607.2145, found: 607.2150.

### 3. Reaction of NP with $\text{ONOO}^-$ analyzed by HPLC and LC-MS

To a solution of NP in DMSO (4  $\mu\text{M}$ , 175  $\mu\text{L}$ ) was added PBS (100 mM, 455  $\mu\text{L}$ ) and an alkaline solution of peroxynitrite (100  $\mu\text{M}$ , 70  $\mu\text{L}$ ). After stirred for 10 min, the reaction mixture was analyzed by HPLC and LC-MS. The samples were eluted from a XBridge C18 column (4.6 X 250 mm, 5  $\mu\text{M}$ ) with  $\text{CH}_3\text{COONH}_4$  (pH = 6.8, 20 mM)

and CH<sub>3</sub>CN as eluent (20% - 40% CH<sub>3</sub>CN in 5 min, then 40% - 60% CH<sub>3</sub>CN from 5 min to 25 min) at a flow rate of 1 mL/min.

#### 4. Determination of the fluorescence quantum yield.

Fluorescence quantum yields for NP and NP-P were determined by using Rhodamine-B ( $\Phi_F = 0.89$  in ethanol) as a fluorescence standard. The quantum yield was calculated using the following equation:

$$\Phi_{F(\text{sample})} = \Phi_{F(\text{reference})} (A_{\text{reference}}/A_{\text{sample}}) (F_{\text{sample}}/F_{\text{reference}}) (n_{\text{sample}}/n_{\text{reference}})^2$$

where  $\Phi_F$  is the fluorescence quantum yield, A is the absorbance at the excitation wavelength, F is the area under the corrected emission curve, and n is the refractive index of the solvents used.

#### 5. Cytotoxicity assays

Raw 264.7 macrophage cells were grown in RPMI 1640 medium supplemented with 10% FBS (Fetal Bovine Serum) and 1% antibiotics at 37 °C in humidified environment of 5% CO<sub>2</sub>. Immediately before the experiment, the cells were placed in a 96-well plate, followed by addition of increasing concentrations of NP (0.625  $\mu$ M, 1.25  $\mu$ M, 2.5  $\mu$ M, 5.0  $\mu$ M, 10.0  $\mu$ M). The cells were then incubated at 37 °C in an atmosphere of 5% CO<sub>2</sub> and 95% air for 9 h, followed by MTT assays (n = 6). Untreated assay with RPMI 1640 medium (n = 6) was also conducted under the same conditions. (Fig S8) .

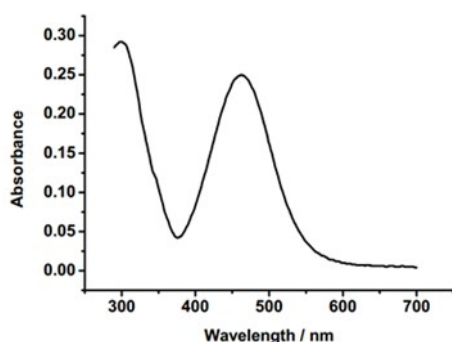

Fig S1. The UV-Absorption of NP (5  $\mu$ M)

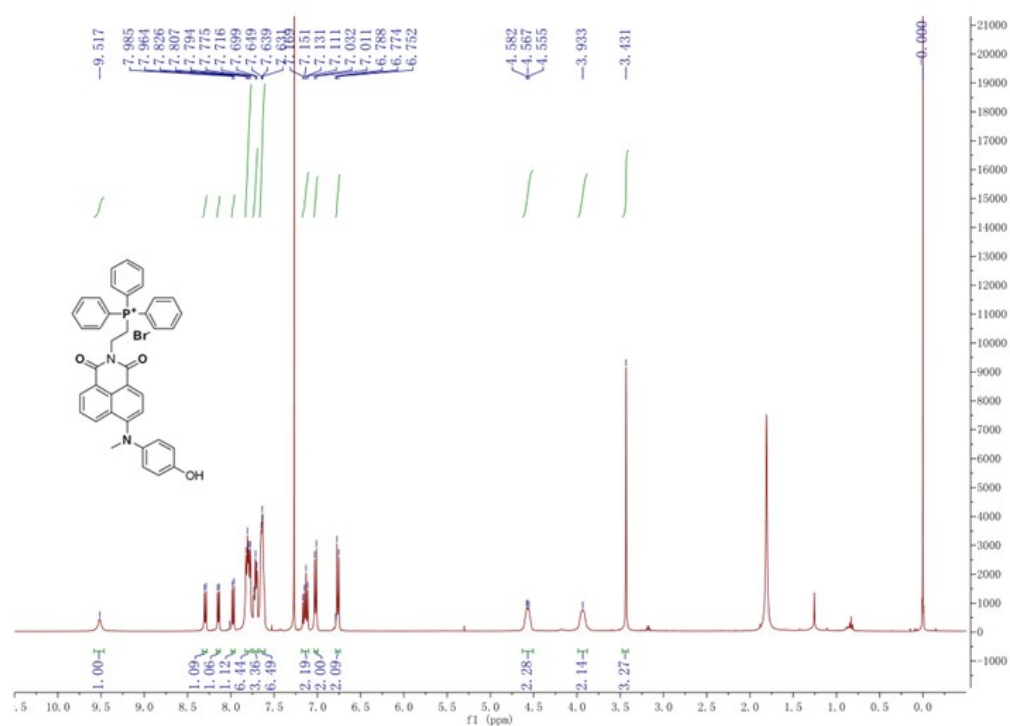

FigS2.  $^1\text{H}$ -NMR spectrum of NP in  $\text{CDCl}_3$

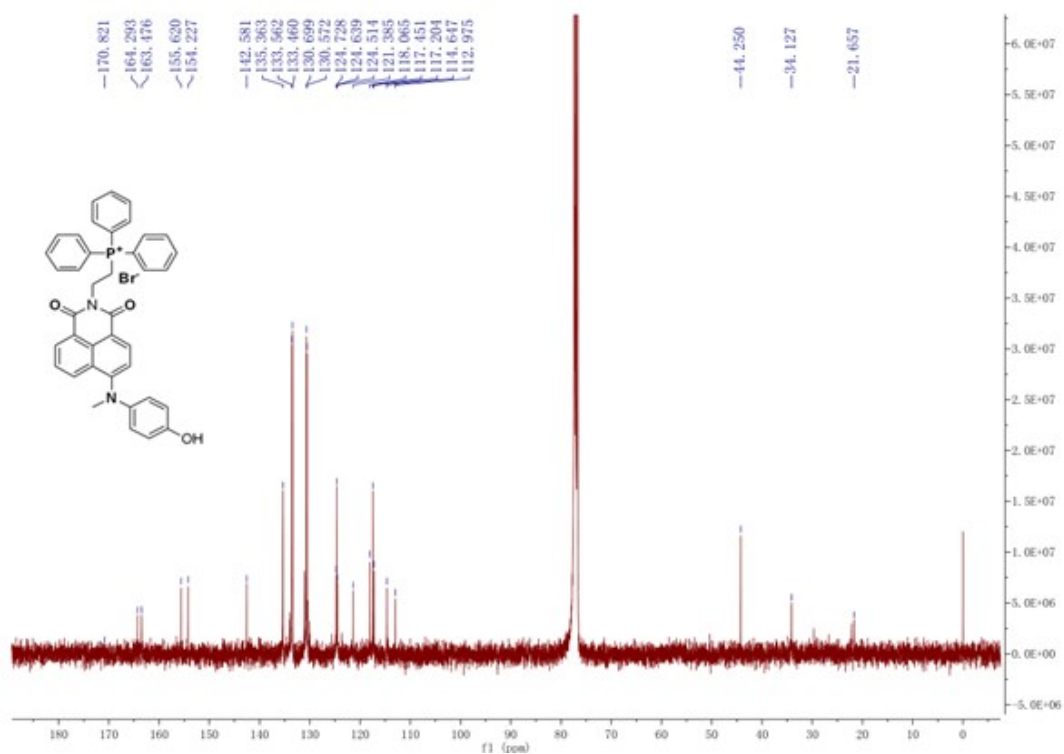

Fig S3.  $^{13}\text{C}$ -NMR spectrum of NP in  $\text{CDCl}_3$

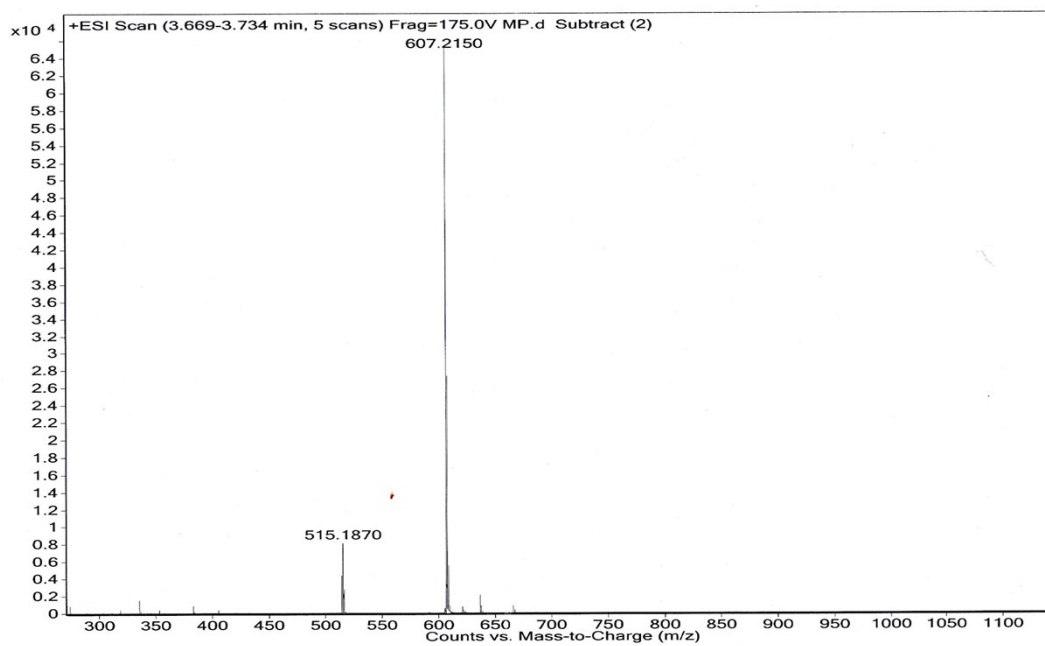

Fig S4. HRMS spectrum of NP in  $\text{CDCl}_3$

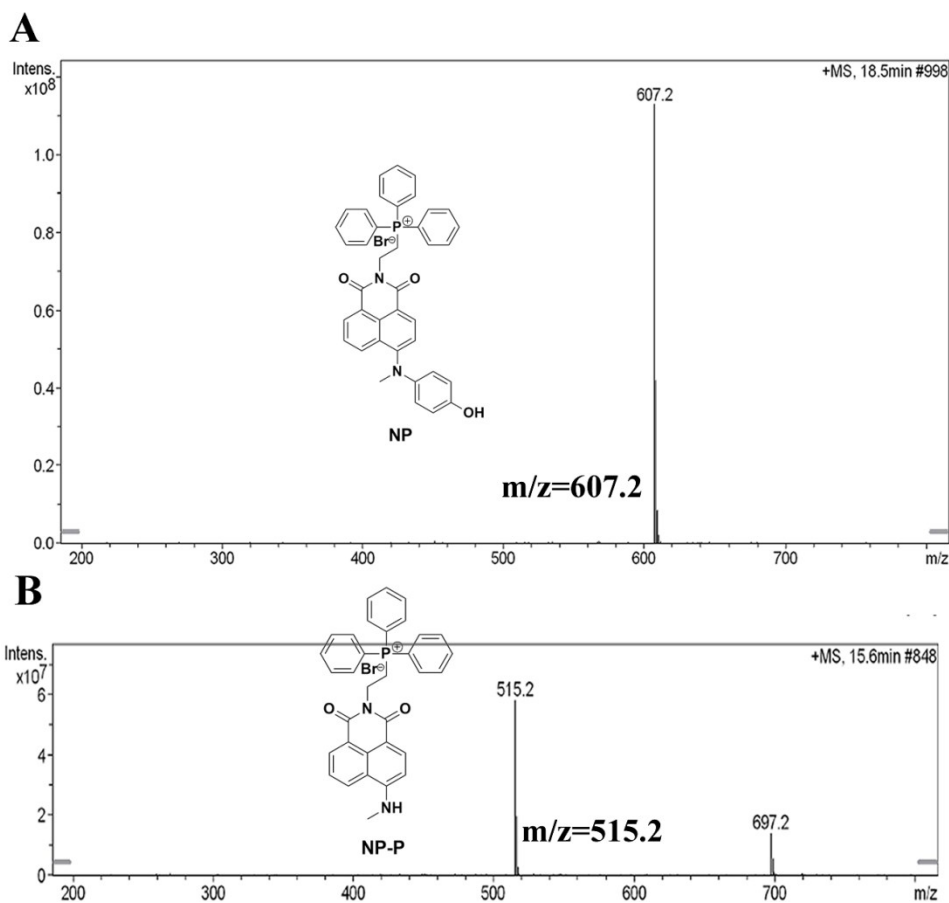

Fig S5. Mass spectra of NP and NP-P

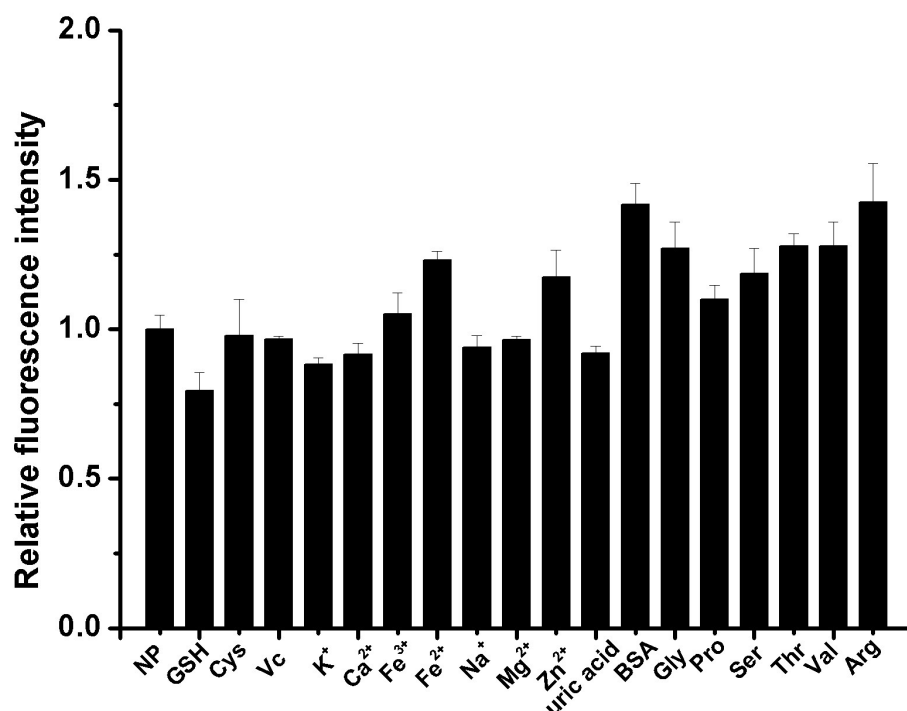

Fig S6: Fluorescence intensity changes of NP (1  $\mu$ M) towards reducing reagents, metal ion and amino acids.

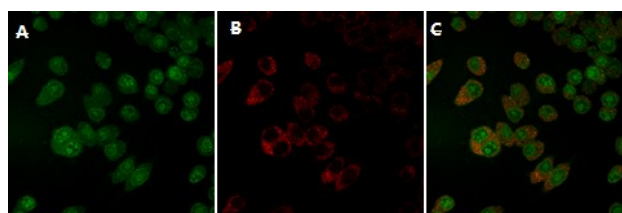

Fig S7 (A-C) Fluorescence images of Raw 264.7 macrophage cells costained by NP (5  $\mu$ M, 30min), Mito Tracker Red FM (1.0  $\mu$ M, 30min) and then SIN-1 (50  $\mu$ M, 30 min): (A) image from band path of 500-600 nm upon excitation of NP at 488 nm; (B) image from band path of 640-730 nm upon excitation of MitoTracker Red FM at 633 nm. (C) the overlay imaging of A and B.

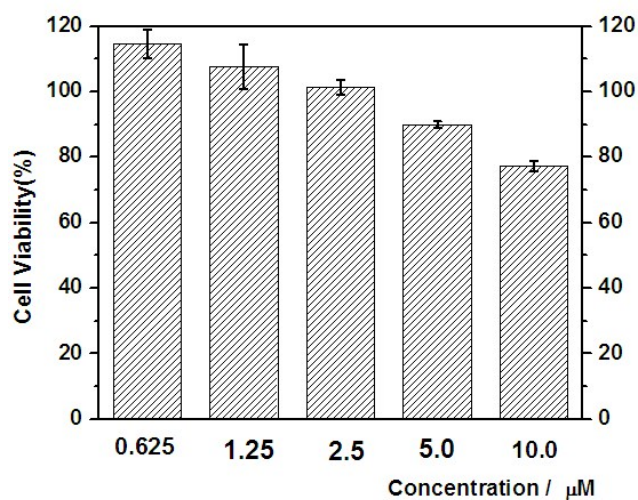

Fig S8. Percentage of viable Raw 264.7 macrophage cells after treatment with indicated concentrations of NP after 9 hours.

## Reference

- (1) Naumenko, A. In *AACE, WebNet 98 - World Conference of the WWW, Internet and Intranet* 1998, p 682.
- (2) Sunduru, N.; Srivastava, K.; Rajakumar, S.; Puri, S. K.; Saxena, J. K.; Chauhan, P. M. S. *Bioorganic & Medicinal Chemistry Letters* 2009, 19, 2570.
- (3) Tian, H.; Liu, P. H.; Zhu, W.; Gao, E.; Wu, D. J.; Cai, S. *Journal of Materials Chemistry* 2000, 10, 2708.
